# Supplementary material for: Surface synergistic effect in well-dispersed Cu/MgO catalysts for highly efficient vapor-phase hydrogenation of carbonyl compounds
Source: Royal Society of Chemistry journal article supplement (doi:10.1039/c5cy00437c), 2015-01-01
Supplement: c5cy00437c1.pdf [file c5cy00437c1.pdf]

## Supplementary materials

### Surface synergistic effect in well-dispersed Cu/MgO catalysts for highly efficient vapor-phase hydrogenation of carbonyl compounds

Hanwen Liu, Qi Hu, Guoli Fan, Lan Yang, Feng Li\*

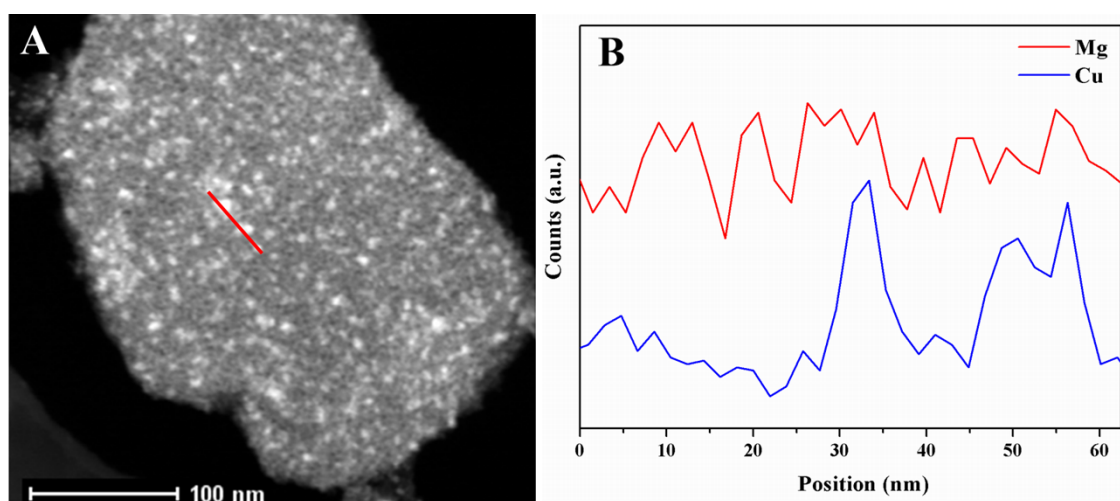

**Fig. S1** HAADF-STEM image (A) of Cu-25 sample with EDS line spectra of Mg and Cu along the red line in A (B).

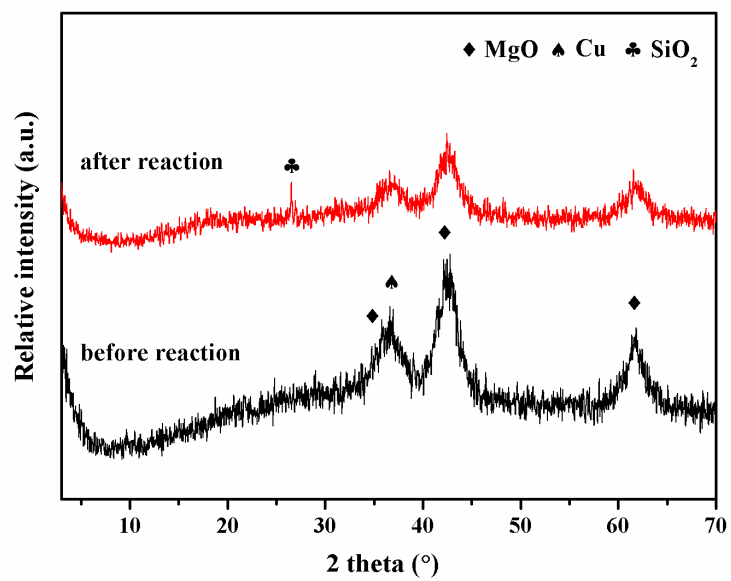

**Fig. S2** XRD patterns of Cu-25 catalyst before and after 200 h of hydrogenation reaction.

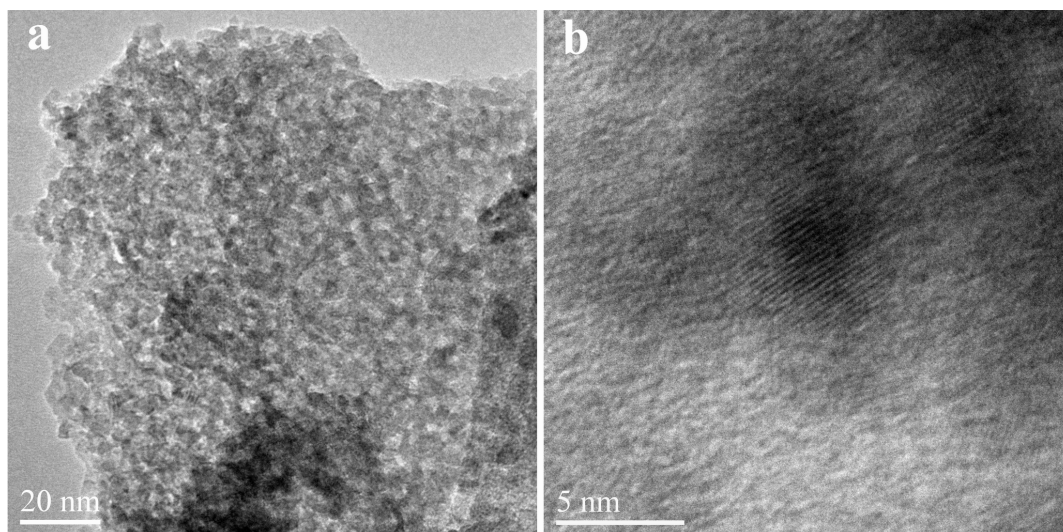

**Fig. S3** HRTEM images (a,b) of used Cu-25 catalyst after 200 h of hydrogenation reaction.
